# Supplementary material
Source: PubMed Central journal article supplement (PMC8569528)
Supplement: mmc1.pdf [file mmc1.pdf]

## Annex A.

**Table 1. Questions and options for responses with the coding for the statistical analysis**

| <b>Section 1. Basic and demographic information</b>                               |   |             |    |
|-----------------------------------------------------------------------------------|---|-------------|----|
| 1) Gender:                                                                        |   | Code value  |    |
| Female                                                                            |   |             | 1  |
| Male                                                                              |   |             | 2  |
| Prefer not to say                                                                 |   |             | 3  |
| <hr/>                                                                             |   |             |    |
| 2) Age:                                                                           |   |             |    |
| 18-25                                                                             |   |             | 1  |
| 26-40                                                                             |   |             | 2  |
| 41-65                                                                             |   |             | 3  |
| 66-80                                                                             |   |             | 4  |
| more than 80                                                                      |   |             | 5  |
| <hr/>                                                                             |   |             |    |
| 3) How long have you been confined at home due to the Covid-19 situation (weeks)? |   |             |    |
| 0                                                                                 |   |             | 1  |
| 1-2                                                                               |   |             | 2  |
| 3-4                                                                               |   |             | 3  |
| 5-6                                                                               |   |             | 4  |
| more than 6                                                                       |   |             | 5  |
| <hr/>                                                                             |   |             |    |
| 4) What is the highest degree or level of education you have completed?           |   |             |    |
| No studies/ elementary school                                                     |   |             | 1  |
| High School                                                                       |   |             | 2  |
| Bachelor's Degree                                                                 |   |             | 3  |
| Master's Degree                                                                   |   |             | 4  |
| Ph.D.                                                                             |   |             | 5  |
| Trade School                                                                      |   |             | 6  |
| <hr/>                                                                             |   |             |    |
| 5) Where did you grow up?                                                         |   |             |    |
| High Density city (more than one million inhabitants)                             |   |             | 1  |
| Large city (less than 1 million but over 300,000 inhabitants)                     |   |             | 2  |
| Medium city (between 100,000 and 300,000 inhabitants)                             |   |             | 3  |
| Large town (between 10,000 and 100,000 inhabitants)                               |   |             | 4  |
| Town (less than 10.000 inhabitants)                                               |   |             | 5  |
| Village/ Rural area (less than 2.500 inhabitants)                                 |   |             | 6  |
| <hr/>                                                                             |   |             |    |
| 6) In which country do you currently live at?                                     |   |             |    |
| Spain                                                                             | 1 | Mexico      | 24 |
| Brazil                                                                            | 2 | Netherlands | 25 |
| Greece                                                                            | 3 | New Zealand | 26 |
| Italy                                                                             | 4 | Norway      | 27 |

|                    |    |              |    |
|--------------------|----|--------------|----|
| Chile              | 5  | Panama       | 28 |
| Colombia           | 6  | Peru         | 29 |
| Argentina          | 7  | Poland       | 30 |
| Australia          | 8  | Portugal     | 31 |
| Austria            | 9  | Russia       | 32 |
| Belgium            | 10 | Slovakia     | 33 |
| Canada             | 11 | South Africa | 34 |
| Czech Republic     | 12 | Switzerland  | 35 |
| Dominican republic | 13 | UK           | 36 |
| Ecuador            | 14 | Uruguay      | 37 |
| Estonia            | 15 | USA          | 38 |
| France             | 16 | Venezuela    | 39 |
| Germany            | 17 | Cyprus       | 40 |
| Guatemala          | 18 | Bulgaria     | 41 |
| Hungary            | 19 | Senegal      | 42 |
| India              | 20 | Sweden       | 43 |
| Ireland            | 21 | Ukraine      | 44 |
| Japan              | 22 | Denmark      | 45 |
| Kosovo             | 23 | Albania      | 46 |

---

7) Name of the city/ town/ village

---

8) Where do you currently live?

|                                                               |   |
|---------------------------------------------------------------|---|
| High Density city (more than one million inhabitants)         | 1 |
| Large city (less than 1 million but over 300,000 inhabitants) | 2 |
| Medium city (between 100,000 and 300,000 inhabitants)         | 3 |
| Large town (between 10,000 and 100,000 inhabitants)           | 4 |
| Town (less than 10,000 inhabitants)                           | 5 |
| Village/ Rural area (less than 2,500 inhabitants)             | 6 |

---

9) Household income:

|        |   |
|--------|---|
| Low    | 1 |
| Middle | 2 |
| High   | 3 |

---

10) Did you or any of your relatives have an incident related with the coronavirus that might affect your mood?

|     |   |
|-----|---|
| Yes | 1 |
| No  | 2 |

---

---

**Section 2.** Description of the household

---

11) What is the type of your house?

|                |   |
|----------------|---|
| House          | 1 |
| apartment/flat | 2 |

---

12) What is the surface of your house?

|                        |   |
|------------------------|---|
| <40 m <sup>2</sup>     | 1 |
| 40-70 m <sup>2</sup>   | 2 |
| 70-100 m <sup>2</sup>  | 3 |
| 100-130 m <sup>2</sup> | 4 |
| >130 m <sup>2</sup>    | 5 |

13) How many rooms does your house have?

|             |   |
|-------------|---|
| 1           | 1 |
| 2           | 2 |
| 3           | 3 |
| 4           | 4 |
| More than 4 | 5 |

---

14) How many people are living in total in your house?

|             |   |
|-------------|---|
| 1-2         | 1 |
| 3-4         | 2 |
| 5-6         | 3 |
| more than 6 | 4 |

---

15) Age of the inhabitants within the household

|                             |              |   |
|-----------------------------|--------------|---|
| a. Infants (<6 years)       | Selected     | 1 |
| a                           | Not selected | 2 |
| b. Elementary (6-11 years)  | Selected     | 1 |
| b                           | Not selected | 2 |
| c. Highschool (12-18 years) | Selected     | 1 |
| c                           | Not selected | 2 |
| d. 18-25                    | Selected     | 1 |
| d                           | Not selected | 2 |
| e. 26-40                    | Selected     | 1 |
| e                           | Not selected | 2 |
| f. 41-65                    | Selected     | 1 |
| f                           | Not selected | 2 |
| g. More than 65             | Selected     | 1 |
| g                           | Not selected | 2 |

---

|                                                     |  |   |
|-----------------------------------------------------|--|---|
| 16) Does the house receive direct sunlight indoors? |  |   |
| Not at all                                          |  | 1 |
| Little                                              |  | 2 |
| Some                                                |  | 3 |
| Quite a lot                                         |  | 4 |
| A lot                                               |  | 5 |

---

|                          |              |   |
|--------------------------|--------------|---|
| 17) Does your house have |              |   |
| a. a balcony/ terrace    | Selected     | 1 |
| a                        | Not selected | 2 |
| b. a garden              | Selected     | 1 |
| b                        | Not selected | 2 |
| c. an accessible rooftop | Selected     | 1 |
| c                        | Not selected | 2 |
| d. a patio               | Selected     | 1 |
| d                        | Not selected | 2 |
| e. none of them          | Selected     | 1 |
| e                        | Not selected | 2 |

---

### Section 3. Attitudes towards nature

---

|                                      |  |   |
|--------------------------------------|--|---|
| 18) Are you Interested in gardening? |  |   |
| Not interested                       |  | 1 |
| Slightly interested                  |  | 2 |
| Indifferent                          |  | 3 |
| Quite interested                     |  | 4 |
| Very interested                      |  | 5 |

---

|                                                                                                                 |  |   |
|-----------------------------------------------------------------------------------------------------------------|--|---|
| 19) How often did you normally visit a public green space (e.g. park, gardens, countryside) before confinement? |  |   |
| Daily                                                                                                           |  | 1 |
| Weekly                                                                                                          |  | 2 |
| Monthly                                                                                                         |  | 3 |
| Less that once per month                                                                                        |  | 4 |
| Never                                                                                                           |  | 5 |

---

|                                                                                                  |  |   |
|--------------------------------------------------------------------------------------------------|--|---|
| 20) Green areas (e.g. park, gardens, countryside) are necessary for my psychological well-being: |  |   |
| Strongly disagree                                                                                |  | 1 |
| Disagree                                                                                         |  | 2 |
| Indifferent                                                                                      |  | 3 |
| Agree                                                                                            |  | 4 |
| Strongly agree                                                                                   |  | 5 |

---

|                                                              |  |   |
|--------------------------------------------------------------|--|---|
| 21) How many plants do you have inside your house (indoors)? |  |   |
| 0                                                            |  | 1 |
| 1-3                                                          |  | 2 |

|              |   |
|--------------|---|
| 4-7          | 3 |
| 8-10         | 4 |
| More than 10 | 5 |

---

|                                                                            |   |
|----------------------------------------------------------------------------|---|
| 22) How many plants do you have outdoors (balcony, backyard, patio, etc.)? |   |
| no space outside                                                           | 1 |
| 0                                                                          | 2 |
| 1-3                                                                        | 3 |
| 4-7                                                                        | 4 |
| 8-10                                                                       | 5 |
| More than 10                                                               | 6 |

---

|                                                |   |
|------------------------------------------------|---|
| 23) Did you know what a living wall is before? |   |
| Yes                                            | 1 |
| No                                             | 2 |

---

|                                                                        |              |   |
|------------------------------------------------------------------------|--------------|---|
| 24) What kind of vegetation do you have at home (indoors or outdoors)? |              |   |
| a. Potted plants                                                       | Selected     | 1 |
|                                                                        | Not selected | 2 |
| b. Flower bed-parterre                                                 | Selected     | 1 |
|                                                                        | Not selected | 2 |
| c. Climbing/hanging plants                                             | Selected     | 1 |
|                                                                        | Not selected | 2 |
| d. Living wall                                                         | Selected     | 1 |
|                                                                        | Not selected | 2 |
| e. Trees                                                               | Selected     | 1 |
|                                                                        | Not selected | 2 |
| f. Shrubs                                                              | Selected     | 1 |
|                                                                        | Not selected | 2 |
| g. Lawn                                                                | Selected     | 1 |
|                                                                        | Not selected | 2 |
| h. Vegetable garden                                                    | Selected     | 1 |
|                                                                        | Not selected | 2 |

---

|                                                                                                   |   |
|---------------------------------------------------------------------------------------------------|---|
| 25) Did you spend more time taking care of plants at home during the COVID-19 confinement period? |   |
| Yes                                                                                               | 1 |
| No                                                                                                | 2 |

---

|                                                                                                 |   |
|-------------------------------------------------------------------------------------------------|---|
| 26) Once the normality is regained, will you devote more time in taking care of plants at home? |   |
| Yes                                                                                             | 1 |
| No                                                                                              | 2 |

---

|                                                                       |   |
|-----------------------------------------------------------------------|---|
| 27) Having vegetation indoors is good for my psychological well-being |   |
| Strongly disagree                                                     | 1 |

|                |   |
|----------------|---|
| Disagree       | 2 |
| Indifferent    | 3 |
| Agree          | 4 |
| Strongly agree | 5 |

---

**Section 4. Plants and the COVID-19 confinement**

---

|                                                                |            |   |
|----------------------------------------------------------------|------------|---|
| 28) Describe your mood during the COVID-19 confinement period? |            |   |
| a. Depressed                                                   | Never      | 1 |
| a                                                              | Sometimes  | 2 |
| a                                                              | Many times | 3 |
| b. Optimistic                                                  | Never      | 3 |
| b                                                              | Sometimes  | 2 |
| b                                                              | Many times | 1 |
| c. Calm                                                        | Never      | 3 |
| c                                                              | Sometimes  | 2 |
|                                                                | Many times | 1 |
| d. Fearful                                                     | Never      | 1 |
| d                                                              | Sometimes  | 2 |
| d                                                              | Many times | 3 |
| e. Cheerful                                                    | Never      | 3 |
| e                                                              | Sometimes  | 2 |
| e                                                              | Many times | 1 |
| f. Stressed                                                    | Never      | 1 |
| f                                                              | Sometimes  | 2 |
| f                                                              | Many times | 3 |
| g. Sad                                                         | Never      | 1 |
| g                                                              | Sometimes  | 2 |
| g                                                              | Many times | 3 |

---

|                                                                                       |   |
|---------------------------------------------------------------------------------------|---|
| 29) Having vegetation at home is positive for my mood during the COVID-19 confinement |   |
| Strongly disagree                                                                     | 1 |
| Disagree                                                                              | 2 |
| Indifferent                                                                           | 3 |
| Agree                                                                                 | 4 |
| Strongly agree                                                                        | 5 |

---

|                                                                                   |   |
|-----------------------------------------------------------------------------------|---|
| 30) I would have preferred to have more plants in my house during the confinement |   |
| Strongly disagree                                                                 | 1 |
| Disagree                                                                          | 2 |
| Indifferent                                                                       | 3 |
| Agree                                                                             | 4 |
| Strongly agree                                                                    | 5 |

---

31a) Has your motivation about having plants at home changed after the period of confinement?

|     |   |
|-----|---|
| Yes | 1 |
| No  | 2 |

---

31b) Did you buy any plants during the confinement period?

|     |   |
|-----|---|
| Yes | 1 |
| No  | 2 |

---



---

**Section 5.** Regarding living walls

---

32) A living wall is a way of having more vegetation at home requiring less space

|                   |   |
|-------------------|---|
| Strongly disagree | 1 |
| Disagree          | 2 |
| Indifferent       | 3 |
| Agree             | 4 |
| Strongly agree    | 5 |

---

33) It would be a good idea to have a living wall at home to increase indoor vegetation

|                   |   |
|-------------------|---|
| Strongly disagree | 1 |
| Disagree          | 2 |
| Indifferent       | 3 |
| Agree             | 4 |
| Strongly agree    | 5 |

---

34) Which could be the main reasons to discourage you from installing a living wall in your home?

|                                         |              |   |
|-----------------------------------------|--------------|---|
| a. None                                 | Selected     | 1 |
| a                                       | Not selected | 2 |
| b. Cost                                 | Selected     | 1 |
| b                                       | Not selected | 2 |
| c. Need for maintenance                 | Selected     | 1 |
| c                                       | Not selected | 2 |
| d. Presence of insects or other animals | Selected     | 1 |
| d                                       | Not selected | 2 |
| e. Problems of dampness                 | Selected     | 1 |
| e                                       | Not selected | 2 |

---

**Section 6.** Rate the following rooms depending on your preference (see Fig. 1) Provision of

two rooms and one balcony with increasing amounts of vegetation and with or without a living wall.

---

Room 1:

|             |                      |   |
|-------------|----------------------|---|
| a. Option A | 1st (Most preferred) | 1 |
|-------------|----------------------|---|

|             |                       |   |
|-------------|-----------------------|---|
| a           | 2nd                   | 2 |
| a           | 3rd                   | 3 |
| a           | 4th (Least preferred) | 4 |
| b. Option B | 1st (Most preferred)  | 1 |
| b           | 2nd                   | 2 |
| b           | 3rd                   | 3 |
| b           | 4th (Least preferred) | 4 |
| c. Option C | 1st (Most preferred)  | 1 |
| c           | 2nd                   | 2 |
| c           | 3rd                   | 3 |
| c           | 4th (Least preferred) | 4 |
| d. Option D | 1st (Most preferred)  | 1 |
| d           | 2nd                   | 2 |
| d           | 3rd                   | 3 |
| d           | 4th (Least preferred) | 4 |
| Room 2:     |                       |   |
| a. Option A | 1st (Most preferred)  | 1 |
| a           | 2nd                   | 2 |
| a           | 3rd                   | 3 |
| a           | 4th (Least preferred) | 4 |
| b. Option B | 1st (Most preferred)  | 1 |
| b           | 2nd                   | 2 |
| b           | 3rd                   | 3 |
| b           | 4th (Least preferred) | 4 |
| c. Option C | 1st (Most preferred)  | 1 |
| c           | 2nd                   | 2 |
| c           | 3rd                   | 3 |
| c           | 4th (Least preferred) | 4 |
| d. Option D | 1st (Most preferred)  | 1 |
| d           | 2nd                   | 2 |
| d           | 3rd                   | 3 |
| d           | 4th (Least preferred) | 4 |
| Balcony:    |                       |   |
| a. Option A | 1st (Most preferred)  | 1 |
| a           | 2nd                   | 2 |
| a           | 3rd                   | 3 |
| a           | 4th (Least preferred) | 4 |
| b. Option B | 1st (Most preferred)  | 1 |
| b           | 2nd                   | 2 |
| b           | 3rd                   | 3 |
| b           | 4th (Least preferred) | 4 |
| c. Option C | 1st (Most preferred)  | 1 |
| c           | 2nd                   | 2 |
| c           | 3rd                   | 3 |
| c           | 4th (Least preferred) | 4 |
| d. Option D | 1st (Most preferred)  | 1 |



|   |                       |   |
|---|-----------------------|---|
| d | 2nd                   | 2 |
| d | 3rd                   | 3 |
| d | 4th (Least preferred) | 4 |

---

**Table 2. Timeline of the COVID-19 pandemic events and control strategies implemented in Spain, Italy, Brazil and Greece.**

| Country  | Date of the 1 <sup>st</sup> and 50 <sup>th</sup> confirmed cases | Closing schools and universities                          | Social distance proposed by the government                                        | Government prohibition of all public events               | Lockdown/ confinement                                                         | Periods between 50 <sup>th</sup> case and the start of social distance |
|----------|------------------------------------------------------------------|-----------------------------------------------------------|-----------------------------------------------------------------------------------|-----------------------------------------------------------|-------------------------------------------------------------------------------|------------------------------------------------------------------------|
| Spain*   | 31 Jan. 2020 and 01 Mar. 2020                                    | 13 Mar. 2020                                              | Social distance and home office 09 Mar. 2020                                      | 14 Mar. 2020                                              | National lockdown 14 Mar. 2020                                                | 8 days                                                                 |
| Italy*   | 31 Jan. 2020 and 22 Feb. 2020                                    | 05 Mar. 2020                                              | Social distance 09 Mar. 2020                                                      | 09 Mar. 2020                                              | National lockdown 11 Mar. 2020                                                | 12 days                                                                |
| Brazil*  | 29 Feb. 2020 and 15 Mar. 2020                                    | Depending on the state: from 11 Mar. 2020 to 31 Mar. 2020 | Home office for vulnerable persons 17 Mar. 2020; Overall home office 22 Mar. 2020 | Depending on the state: from 11 Mar. 2020 to 02 Apr. 2020 | Different degrees of confinement depending on the state, municipality or city | Depending on the state                                                 |
| Greece** | 26 Feb. 2020 and 6 Mar. 2020                                     | 10 Mar. 2020                                              | 10 Mar. 2020                                                                      | 14 Mar. 2020                                              | National lockdown 23 Mar. 2020                                                | 4 days                                                                 |

\* Strategies adopted until April 16<sup>th</sup>, 2020. Adapted from Aquino, Silveira, Pescarini, Aquino, & Souza-Filho (2020).

\*\*Data retrieved from Hellenic Ministries announcements
