# Supplementary material
Source: PubMed Central journal article supplement (PMC8569528)
Supplement: mmc2.pdf [file mmc2.pdf]

### Annex B. Results from the statistical analysis

Table 1. Variables significantly affecting the emotional welfare of the participants during the COVID-19 crisis in the four mean countries. Mean and standard deviation (SD) of the 'Overall emotional well-being' indicator. Different letters within the same factor indicate significant differences between the options.

Overall values for all the countries are presented in the main document (Table 6).

| Factor                                                 | Options                  | Spain |       |     |      | Brazil            |      |       |      |    |                   |
|--------------------------------------------------------|--------------------------|-------|-------|-----|------|-------------------|------|-------|------|----|-------------------|
|                                                        |                          | N     | Mean  | SD  | F; p | N                 | Mean | SD    | F; p |    |                   |
| Being directly affected by the COVID-19                | Yes                      | 149   | 12.42 | 2.7 | a    | F= 14.62; p<0.001 | 305  | 13.69 | 2.7  | a  | F= 75.82; p<0.001 |
|                                                        | No                       | 676   | 11.54 | 2.5 | b    |                   | 940  | 12.16 | 2.7  | b  |                   |
| Age group                                              | 18-25                    | 157   | 12.57 | 2.6 | a    | F= 11.93; p<0.001 | 214  | 13.72 | 2.8  | a  | F= 43.04; p<0.001 |
|                                                        | 26-40                    | 277   | 11.76 | 2.6 | ab   |                   | 353  | 13.21 | 2.7  | a  |                   |
|                                                        | 41-65                    | 357   | 11.41 | 2.4 | b    |                   | 598  | 11.91 | 2.5  | b  |                   |
|                                                        | 66+                      | 34    | 10.21 | 2.4 | c    |                   | 80   | 11.01 | 2.7  | c  |                   |
| Receiving natural light indoors                        | Not at all / Little      | 93    | 12.29 | 2.3 | a    | F=10.46; p<0.001  | 223  | 13.16 | 2.7  | a  | F=8.46; p<0.001   |
|                                                        | Some                     | 166   | 12.4  | 2.5 | a    |                   | 513  | 12.6  | 2.7  | ab |                   |
|                                                        | Quite a lot              | 370   | 11.57 | 2.6 | b    |                   | 396  | 12.34 | 2.8  | b  |                   |
| Frequency of visiting green spaces prior to the crisis | A lot                    | 196   | 11.07 | 2.4 | b    | F=3.21; p=0.022   | 113  | 11.67 | 2.6  | c  | F=8.32; p<0.001   |
|                                                        | Daily                    | 241   | 11.29 | 2.5 | a    |                   | 326  | 12.07 | 2.7  | a  |                   |
|                                                        | Weekly                   | 406   | 11.80 | 2.5 | a    |                   | 422  | 12.38 | 2.6  | ab |                   |
|                                                        | Monthly                  | 113   | 12.06 | 2.8 | a    |                   | 194  | 13.15 | 2.7  | c  |                   |
| Size of the house                                      | Less than once per month | 65    | 11.92 | 2.4 | a    | F=4.0; p=0.003    | 303  | 12.85 | 2.9  | bc | F=6.6; p<0.001    |
|                                                        | < 40 m2                  | 12    | 12.92 | 2.1 | a    |                   | 93   | 12.90 | 2.9  | a  |                   |
|                                                        | 40-70 m2                 | 145   | 12.23 | 2.8 | ab   |                   | 288  | 13.06 | 2.8  | a  |                   |
|                                                        | 70-100 m2                | 276   | 11.78 | 2.6 | ab   |                   | 264  | 12.69 | 2.7  | ab |                   |
|                                                        | 100-130 m2               | 185   | 11.54 | 2.6 | ab   |                   | 233  | 12.32 | 2.7  | ab |                   |
| > 130 m2                                               | 207                      | 11.28 | 2.2   | b   | 367  | 12.05             | 2.6  | b     |      |    |                   |

|                          |        |     |       |     |   |                      |     |       |     |    |                      |
|--------------------------|--------|-----|-------|-----|---|----------------------|-----|-------|-----|----|----------------------|
| Gender                   | Female | 477 | 12.17 | 2.6 | a | F= 43.42;<br>p<0.001 | 845 | 12.77 | 2.8 | a  | F= 20.88;<br>p<0.001 |
|                          | Male   | 339 | 11.00 | 2.4 | b |                      | 397 | 12.02 | 2.6 | b  |                      |
| Number of plants indoors | 0      | 197 | 11.83 | 2.7 | a | n.s.                 | 376 | 12.90 | 2.8 | a  | F=3.33;<br>p=0.01    |
|                          | 1-3    | 306 | 11.9  | 2.5 | a |                      | 378 | 12.52 | 2.7 | ab |                      |
|                          | 4-7    | 160 | 11.56 | 2.3 | a |                      | 216 | 12.38 | 2.6 | ab |                      |
|                          | 8-10   | 66  | 11.24 | 3.0 | a |                      | 80  | 11.91 | 2.7 | b  |                      |
|                          | >10    | 96  | 11.32 | 2.5 | a |                      | 195 | 12.28 | 2.8 | ab |                      |

| Factor                                                 | Options                  | Greece |       |     |    |                  | Italy |       |     |   |                     |
|--------------------------------------------------------|--------------------------|--------|-------|-----|----|------------------|-------|-------|-----|---|---------------------|
|                                                        |                          | N      | Mean  | SD  |    | F; p             | N     | Mean  | SD  |   | F; p                |
| Being directly affected by the COVID-19                | Yes                      | 52     | 13.46 | 2.8 | a  | F= 6.82; p=0.009 | 66    | 13.56 | 2.5 | a | F= 9.81;<br>p=0.002 |
|                                                        | No                       | 948    | 12.48 | 2.6 | b  |                  | 331   | 12.55 | 2.4 | b |                     |
| Age group                                              | 18-25                    | 226    | 12.74 | 2.7 | a  | F= 2.78; p=0.04  | 37    | 13.05 | 2.4 | a | n.s.                |
|                                                        | 26-40                    | 393    | 12.69 | 2.7 | a  |                  | 215   | 12.8  | 2.3 | a |                     |
|                                                        | 41-65                    | 355    | 12.26 | 2.6 | a  |                  | 118   | 12.68 | 2.5 | a |                     |
|                                                        | 66+                      | 26     | 11.88 | 2.3 | a  |                  | 27    | 11.81 | 2.6 | a |                     |
|                                                        | Not at all / Little      | 161    | 13.1  | 2.5 | a  |                  | 23    | 13.13 | 2.7 | a |                     |
| Receiving natural light indoors                        | Some                     | 390    | 12.75 | 2.8 | ab | F=6.86; p<0.001  | 37    | 13.16 | 2.1 | a | n.s.                |
|                                                        | Quite a lot              | 278    | 12.19 | 2.5 | b  |                  | 141   | 12.99 | 2.6 | a |                     |
|                                                        | A lot                    | 171    | 12.05 | 2.6 | bc |                  | 196   | 12.39 | 2.3 | a |                     |
| Frequency of visiting green spaces prior to the crisis | Daily                    | 266    | 12.26 | 2.7 | a  | n.s.             | 86    | 12.41 | 2.4 | a | n.s.                |
|                                                        | Weekly                   | 458    | 12.58 | 2.6 | a  |                  | 203   | 12.77 | 2.5 | a |                     |
|                                                        | Monthly                  | 154    | 12.81 | 2.7 | a  |                  | 61    | 12.79 | 2.1 | a |                     |
|                                                        | Less than once per month | 121    | 12.58 | 2.9 | a  |                  | 47    | 12.96 | 2.7 | a |                     |
| Size of the house                                      | < 40 m2                  | 46     | 12.7  | 2.5 | a  | n.s.             | 12    | 14.67 | 1.9 | a | F=2.4; p=0.05       |
|                                                        | 40-70 m2                 | 206    | 12.74 | 2.6 | a  |                  | 97    | 12.54 | 2.2 | b |                     |
|                                                        | 70-100 m2                | 397    | 12.58 | 2.6 | a  |                  | 115   | 12.72 | 2.3 | b |                     |
|                                                        | 100-130 m2               | 239    | 12.56 | 2.8 | a  |                  | 102   | 12.84 | 2.7 | b |                     |
|                                                        | > 130 m2                 | 112    | 11.83 | 2.7 | a  | 71               | 12.45 | 2.5   | b   |   |                     |

|                          |        |     |       |     |   |                  |     |       |     |   |      |
|--------------------------|--------|-----|-------|-----|---|------------------|-----|-------|-----|---|------|
| Gender                   | Female | 338 | 11.83 | 2.6 | b | F= 34.9; p<0.001 | 262 | 12.77 | 2.4 | a | n.s. |
|                          | Male   | 654 | 12.86 | 2.6 | a |                  | 133 | 12.60 | 2.4 | a |      |
| Number of plants indoors | 0      | 298 | 12.47 | 2.7 | a | n.s.             | 88  | 12.61 | 2.4 | a | n.s. |
|                          | 1-3    | 414 | 12.69 | 2.6 | a |                  | 158 | 12.78 | 2.4 | a |      |
|                          | 4-7    | 176 | 12.6  | 2.7 | a |                  | 76  | 12.82 | 2.3 | a |      |
|                          | 8-10   | 47  | 12.04 | 2.4 | a |                  | 39  | 13.15 | 2.9 | a |      |
|                          | >10    | 65  | 11.89 | 2.8 | a |                  | 36  | 12.00 | 2.5 | a |      |

Table 2. Relations between the change of motivation about plants after the period of confinement and several independent variables.

| Independent variable                    | All Data |                  | Spain  |                  | Brazil |                  | Greece |                  | Italy  |                  |
|-----------------------------------------|----------|------------------|--------|------------------|--------|------------------|--------|------------------|--------|------------------|
|                                         | Exp(B)   | p-value          | Exp(B) | p-value          | Exp(B) | p-value          | Exp(B) | p-value          | Exp(B) | p-value          |
| Gender                                  | 1.01     | ns               | 0.73   | ns               | 1.05   | ns               | 1.55   | <b>0.006</b>     | 0.87   | ns               |
| Age                                     | 0.76     | <b>&lt;0,001</b> | 0.78   | <b>0.017</b>     | 0.78   | <b>0.005</b>     | 0.73   | <b>0.001</b>     | 0.90   | ns               |
| Weeks of confinement                    | 1.01     | ns               | 1.04   | ns               | 0.95   | ns               | 1.01   | ns               | 0.99   | ns               |
| Type of settlement living in            | 0.99     | ns               | 0.99   | ns               | 1.00   | ns               | 0.98   | ns               | 0.93   | ns               |
| Household income                        | 1.01     | ns               | 1.33   | ns               | 1.22   | ns               | 1.04   | ns               | 1.07   | ns               |
| Being directly affected by the COVID-19 | 1.03     | ns               | 1.18   | ns               | 1.17   | ns               | 1.29   | ns               | 0.44   | <b>0.012</b>     |
| Type of house                           | 1.02     | ns               | 0.87   | ns               | 1.03   | ns               | 0.92   | ns               | 1.05   | ns               |
| House size                              | 0.97     | ns               | 0.98   | ns               | 0.95   | ns               | 1.02   | ns               | 1.02   | ns               |
| Receiving sunlight indoors              | 1.10     | <b>0.009</b>     | 0.94   | ns               | 1.09   | ns               | 0.94   | ns               | 0.89   | ns               |
| Number of plants outdoors               | 0.59     | <b>&lt;0,001</b> | 0.67   | ns               | 0.55   | <b>&lt;0,001</b> | 0.37   | <b>&lt;0,001</b> | 0.78   | ns               |
| Number of plants indoors                | 0.63     | <b>&lt;0,001</b> | 0.51   | <b>0.001</b>     | 0.69   | <b>0.022</b>     | 0.52   | <b>&lt;0,001</b> | 0.95   | ns               |
| Interest in gardening                   | 1.14     | <b>&lt;0,001</b> | 1.19   | <b>0.041</b>     | 1.26   | <b>0.003</b>     | 1.10   | ns               | 1.23   | ns               |
| Frequency visiting green spaces         | 0.92     | <b>0.020</b>     | 0.92   | ns               | 1.09   | ns               | 0.88   | ns               | 0.93   | ns               |
| Necessity of green spaces               | 1.15     | <b>0.008</b>     | 1.01   | ns               | 1.52   | <b>0.001</b>     | 1.16   | ns               | 1.56   | <b>0.019</b>     |
| More time spent caring for plants       | 3.34     | <b>&lt;0,001</b> | 5.00   | <b>&lt;0,001</b> | 3.23   | <b>&lt;0,001</b> | 4.66   | <b>&lt;0,001</b> | 3.86   | <b>&lt;0,001</b> |

|                                              |      |                  |      |                  |      |                  |      |              |      |              |
|----------------------------------------------|------|------------------|------|------------------|------|------------------|------|--------------|------|--------------|
| Psychological influence of indoor vegetation | 1.87 | <b>&lt;0,001</b> | 2.38 | <b>&lt;0,001</b> | 2.00 | <b>0.009</b>     | 1.69 | <b>0.004</b> | 2.24 | <b>0.003</b> |
| Overall emotional well-being                 | 1.06 | <b>&lt;0,001</b> | 1.02 | ns               | 1.10 | <b>&lt;0,001</b> | 1.03 | ns           | 1.03 | ns           |

An Exp(B) > 1 indicates that for larger values of the independent variable there is high probability to change motivation about plants

An Exp(B) < 1 indicates that for larger values of the independent variable there is a small probability to change motivation about plants

Table 3. Relations between the preference for more plants during confinement and several independent variables.

| Independent variable                         | All Data |                  | Spain  |                  | Brazil |                  | Greece |                  | Italy  |                  |
|----------------------------------------------|----------|------------------|--------|------------------|--------|------------------|--------|------------------|--------|------------------|
|                                              | Exp(B)   | p-value          | Exp(B) | p-value          | Exp(B) | p-value          | Exp(B) | p-value          | Exp(B) | p-value          |
| Gender                                       | 1.07     | ns               | 1.11   | ns               | 0.85   | ns               | 1.19   | ns               | 0.79   | ns               |
| Age                                          | 0.90     | <b>0.025</b>     | 0.90   | ns               | 0.79   | <b>0.014</b>     | 0.98   | ns               | 0.84   | ns               |
| Weeks of confinement                         | 0.93     | <b>0.03</b>      | 0.85   | <b>0.044</b>     | 0.89   | ns               | 0.98   | ns               | 1.16   | ns               |
| Type of settlement living in                 | 0.90     | <b>&lt;0,001</b> | 0.86   | <b>0.027</b>     | 0.99   | ns               | 1.07   | ns               | 0.90   | ns               |
| Household income                             | 1.05     | ns               | 1.69   | <b>0.013</b>     | 0.96   | ns               | 0.84   | ns               | 1.96   | <b>0.012</b>     |
| Being directly affected by the COVID-19      | 1.16     | ns               | 1.33   | ns               | 1.20   | ns               | 1.42   | ns               | 0.86   | ns               |
| Type of house                                | 1.07     | ns               | 1.33   | ns               | 1.38   | ns               | 1.35   | ns               | 1.58   | ns               |
| House size                                   | 0.91     | <b>0.006</b>     | 1.02   | ns               | 0.86   | <b>0.014</b>     | 0.92   | ns               | 0.88   | ns               |
| Receiving sunlight indoors                   | 0.85     | <b>&lt;0,001</b> | 0.84   | ns               | 0.95   | ns               | 0.83   | <b>0.017</b>     | 0.90   | ns               |
| Number of plants outdoors                    | 0.66     | <b>&lt;0,001</b> | 0.63   | <b>0.032</b>     | 0.77   | ns               | 0.91   | ns               | 0.62   | ns               |
| Number of plants indoors                     | 0.53     | <b>&lt;0,001</b> | 0.43   | <b>&lt;0,001</b> | 0.59   | <b>0.002</b>     | 0.51   | <b>&lt;0,001</b> | 0.41   | <b>&lt;0,001</b> |
| Interest in gardening                        | 1.43     | <b>&lt;0,001</b> | 1.50   | <b>&lt;0,001</b> | 1.56   | <b>&lt;0,001</b> | 1.22   | <b>0.003</b>     | 1.27   | ns               |
| Frequency visiting green spaces              | 0.96     | ns               | 0.88   | ns               | 0.90   | ns               | 1.05   | ns               | 0.89   | ns               |
| Necessity of green spaces                    | 1.35     | <b>&lt;0,001</b> | 1.27   | <b>0.015</b>     | 1.91   | <b>&lt;0,001</b> | 1.35   | <b>0.015</b>     | 1.23   | ns               |
| More time spent caring for plants            | 2.08     | <b>&lt;0,001</b> | 2.38   | <b>&lt;0,001</b> | 1.89   | <b>&lt;0,001</b> | 2.66   | <b>&lt;0,001</b> | 1.42   | ns               |
| Psychological influence of indoor vegetation | 3.77     | <b>&lt;0,001</b> | 3.27   | <b>&lt;0,001</b> | 2.94   | <b>&lt;0,001</b> | 3.82   | <b>&lt;0,001</b> | 4.50   | <b>&lt;0,001</b> |
| Overall emotional well-being                 | 1.04     | <b>0.002</b>     | 1.02   | ns               | 1.06   | <b>0.046</b>     | 1.04   | ns               | 0.97   | ns               |

An Exp(B) > 1 indicates that for larger values of the independent variable there is high probability to prefer more plants during confinement

An Exp(B) < 1 indicates that for larger values of the independent variable there is a small probability to prefer more plants during confinement
